# Supplementary material
Source: PubMed Central journal article supplement (PMC2459340)
Supplement: NIHMS54487-supplement-Supp_table_5.pdf [file NIHMS54487-supplement-Supp_table_5.pdf]

**Table S5 Microarray list of genes differentially expressed in CD29<sup>H</sup>CD24<sup>H</sup> vs. other subpopulations from p53 null mammary tumor c**

| probe set    | gene                     | Accession | EntrezGene | Description     | Fold CD29 <sup>H</sup> CD24 <sup>H</sup> /the res |
|--------------|--------------------------|-----------|------------|-----------------|---------------------------------------------------|
| 1437836_x_at | RIKEN cDNA 061001        | BB357560  | 68295      | gb:BB357560 /D  | 0.056                                             |
| 1438549_a_at | serine racemase          | BB020681  | 27364      | gb:BB020681 /D  | 0.085                                             |
| 1422514_at   | AE binding protein 1     | NM_009636 | 11568      | gb:NM_009636.   | 0.090                                             |
| 1459592_a_at | Similar to RelA-associ   | BB752796  | 243869     | gb:BB752796 /D  | 0.091                                             |
| 1434110_x_at | major urinary protein 1  | BF322785  | 17840      | gb:BF322785 /D  | 0.101                                             |
| 1438987_at   | RIKEN cDNA 4921509       | AV044525  | 70897      | gb:AV044525 /E  | 0.101                                             |
| 1455990_at   | kinesin family member    | AW986176  | 71819      | gb:AW986176 /I  | 0.110                                             |
| 1443798_at   | phosphatidylinositol 3-  | BB207248  | 18707      | gb:BB207248 /D  | 0.116                                             |
| 1433792_at   | expressed sequence AW    | AW491344  | 101363     | gb:AW491344 /I  | 0.117                                             |
| 1447625_at   | E2F transcription factor | BB286270  | 13559      | gb:BB286270 /D  | 0.117                                             |
| 1451369_at   | COMM domain contain      | BC025891  | 66398      | gb:BC025891.1 / | 0.119                                             |
| 1459593_x_at | Similar to RelA-associ   | BB752796  | 243869     | gb:BB752796 /D  | 0.122                                             |
| 1423323_at   | tumor-associated calciu  | AV241768  | 56753      | gb:AV241768 /E  | 0.123                                             |
| 1433211_at   | repetin                  | AK009453  | 20129      | gb:AK009453.1   | 0.124                                             |
| 1434950_a_at | RIKEN cDNA 1200015       | BE995635  | 74125      | gb:BE995635 /D  | 0.129                                             |
| 1447908_x_at | tetratricopeptide repeat | BB426368  | 22129      | gb:BB426368 /D  | 0.133                                             |
| 1439745_at   | Calcium channel, volta   | AV338037  | 385052     | gb:AV338037 /E  | 0.134                                             |
| 1419444_at   | Sin3-associated polypep  | NM_009119 | 20220      | gb:BG085340 /D  | 0.135                                             |
| 1448859_at   | chemokine (C-X-C mot     | AF030636  | 55985      | gb:AF030636.1 / | 0.135                                             |
| 1455545_at   | RIKEN cDNA 1110065       | BI415815  | 68920      | gb:BI415815 /D  | 0.138                                             |
| 1416882_at   | regulator of G-protein s | NM_026418 | 67865      | gb:NM_026418.   | 0.140                                             |
| 1417726_at   | Sjogren's syndrome/scl   | BC021593  | 56390      | gb:BC021593.1 / | 0.140                                             |
| 1435855_x_at | pyrroline-5-carboxylate  | BF148128  | 56454      | gb:BF148128 /D  | 0.142                                             |
| 1445068_at   | mucosa associated lym    | BM239348  | 240354     | gb:BM239348 /I  | 0.144                                             |
| 1429389_at   | SET domain and marin     | AK017895  | 74729      | gb:AK017895.1   | 0.150                                             |
| 1429474_at   | RIKEN cDNA 1810016       | BE283373  | 77219      | gb:BE283373 /D  | 0.151                                             |
| 1451972_at   | glucocorticoid induced   | AA152997  | 170772     | gb:AA152997 /E  | 0.152                                             |
| 1460278_a_at | DNA segment, Chr 15,     | NM_134095 | 28075      | gb:NM_134095.   | 0.152                                             |
| 1451554_a_at | RIKEN cDNA 6530402       | BC012406  | 226548     | gb:BC012406.1 / | 0.154                                             |
| 1419710_at   | neurexophilin 3          | NM_130858 | 104079     | gb:NM_130858.   | 0.158                                             |
| 1424148_a_at | expressed sequence AW    | BC026642  | 106766     | gb:BC026642.1 / | 0.158                                             |
| 1454647_at   | RIKEN cDNA 5730439       | BQ031255  | 102632     | gb:BQ031255 /D  | 0.159                                             |
| 1428171_at   | PRP39 pre-mRNA proc      | BB460975  | 328110     | gb:BB765556 /D  | 0.160                                             |
| 1418019_at   | carboxypeptidase D       | NM_007754 | 12874      | gb:BG866595 /E  | 0.166                                             |
| 1454803_a_at | histone deacetylase 11   | BB183559  | 232232     | gb:BB183559 /D  | 0.167                                             |
| 1453409_at   | RIKEN cDNA 1110038       | AK004156  | 68755      | gb:AK004156.1   | 0.170                                             |
| 1440689_at   | RIKEN cDNA 6230415       | AW555308  | 109037     | gb:AW555308 /I  | 0.173                                             |
| 1416127_a_at | aspartyl aminopeptidase  | NM_016878 | 13437      | gb:NM_016878.   | 0.174                                             |
| 1448008_at   | ankyrin repeat and KH    | BG081523  | 108857     | gb:BG081523 /D  | 0.177                                             |
| 1418945_at   | matrix metalloproteinase | NM_010809 | 17392      | gb:NM_010809.   | 0.180                                             |
| 1447672_x_at | expressed sequence AW    | BB102342  | 244631     | gb:BB102342 /D  | 0.180                                             |
| 1415901_at   | procollagen-lysine, 2-ox | NM_011962 | 26433      | gb:NM_011962.   | 0.183                                             |
| 1452097_a_at | dual specificity phosph  | BE136125  | 235584     | gb:BB324811 /D  | 0.183                                             |

|         |      |                                  |           |        |                 |       |
|---------|------|----------------------------------|-----------|--------|-----------------|-------|
| 1460220 | a at | colony stimulating factor        | BM233698  | 12977  | gb:NM_007778.   | 0.191 |
| 1416783 | at   | tachykinin 1                     | NM_009311 | 21333  | gb:NM_009311.   | 0.193 |
| 1447870 | x at | RIKEN cDNA 1110002               | BB099116  | 67816  | gb:BB099116 /D  | 0.193 |
| 1418243 | at   | ficolin A                        | NM_007995 | 14133  | gb:NM_007995.   | 0.196 |
| 1422547 | at   | RAN binding protein 1            | L25255    | 19385  | gb:L25255.1 /DF | 0.196 |
| 1416906 | at   | anaphase-promoting complex       | NM_021505 | 59008  | gb:NM_021505.   | 0.202 |
| 1439360 | x at | DNA segment, Chr 15,             | BM244537  | 52683  | gb:BM244537 /I  | 0.206 |
| 1425323 | a at | cDNA sequence BC008              | BC008155  | 214917 | gb:BC008155.1 / | 0.210 |
| 1438165 | x at | gb:BB559097 /DB XR               | BB559097  |        | gb:BB559097 /D  | 0.210 |
| 1418685 | at   | toll-interleukin 1 receptor      | NM_054096 | 117149 | gb:NM_054096.   | 0.218 |
| 1423521 | at   | lamin B1                         | AA270173  | 16906  | gb:AA270173 /E  | 0.218 |
| 1424619 | at   | splicing factor 3b, subunit      | BC024418  | 107701 | gb:BC024418.1 / | 0.222 |
| 1422021 | at   | sprouty homolog 4 (Drosophila)   | BG070168  | 24066  | gb:BG070168 /D  | 0.224 |
| 1426098 | a at | calpastatin                      | AF190152  | 12380  | gb:AF190152.1 / | 0.224 |
| 1430763 | at   | RIKEN cDNA 4930563               | BB016642  | 75304  | gb:BB016642 /D  | 0.224 |
| 1427711 | a at | CEA-related cell adhesion        | X15351    | 26365  | gb:X15351.1 /DI | 0.228 |
| 1428966 | at   | RIKEN cDNA 2610204               | AK018614  | 67148  | gb:AK018614.1   | 0.230 |
| 1436906 | at   | RIKEN cDNA 1110031               | BF781579  | 68718  | gb:BF781579 /D  | 0.230 |
| 1420640 | at   | junction-mediating and           | BF227962  | 57748  | gb:AV275997 /E  | 0.232 |
| 1453229 | s at | RIKEN cDNA 2610041               | AK019085  | 66576  | gb:AK019085.1   | 0.235 |
| 1453312 | at   | RIKEN cDNA 1200006               | BB264725  | 74106  | gb:BB264725 /D  | 0.235 |
| 1453824 | at   | RIKEN cDNA A93002                | BG085812  | 77969  | gb:BG085812 /D  | 0.235 |
| 1416576 | at   | suppressor of cytokine signaling | NM_007707 | 12702  | gb:NM_007707.   | 0.237 |
| 1423872 | a at | dystroglycan 1                   | BC007150  | 13138  | gb:BC007150.1   | 0.237 |
| 1438040 | a at | tumor rejection antigen          | BE995678  | 22027  | gb:BE995678 /D  | 0.237 |
| 1418753 | at   | glutamine fructose-6-phosphate   | NM_013529 | 14584  | gb:NM_013529.   | 0.238 |
| 1434114 | at   | Xenopus prevents mitochondrial   | BG076284  | 227656 | gb:BG076284 /D  | 0.238 |
| 1451567 | a at | interferon activated gene        | BC008167  | 15950  | gb:BC008167.1 / | 0.238 |
| 1427816 | at   | splicing factor, arginine        | U14648    | 20382  | gb:U14648.1 /DI | 0.240 |
| 1419872 | at   | colony stimulating factor        | AI323359  | 12978  | gb:AI323359 /D  | 0.241 |
| 1433548 | at   | alpha globin regulatory          | BB137740  | 17168  | gb:BB137740 /D  | 0.245 |
| 1452532 | x at | CEA-related cell adhesion        | M61907    | 26365  | gb:M61907.1 /D  | 0.247 |
| 1456584 | x at | 3-phosphoglycerate dehydrogenase | BB495884  | 236539 | gb:BB495884 /D  | 0.247 |
| 1456731 | x at | RIKEN cDNA 1500004               | AV169424  | 67005  | gb:AV169424 /E  | 0.248 |
| 1431554 | a at | annexin A9                       | AK003395  | 71790  | gb:AK003395.1   | 0.252 |
| 1455836 | at   | poly (A) polymerase alpha        | BM230222  | 18789  | gb:BM230222 /I  | 0.252 |
| 1460720 | at   | transient receptor potential     | NM_019828 | 56407  | gb:NM_019828.   | 0.252 |
| 1421269 | at   | UDP-glucose ceramide             | AA591863  | 22234  | gb:AA591863 /E  | 0.253 |
| 1460732 | a at | periplakin                       | AF126834  | 19041  | gb:AF126834.1 / | 0.253 |
| 1419814 | s at | S100 calcium binding protein     | AI266795  | 20193  | gb:AI266795 /D  | 0.255 |
| 1423067 | at   | CDK5 regulatory subunit          | AV056485  | 80280  | gb:AV056485 /E  | 0.255 |
| 1427504 | s at | splicing factor, arginine        | AF250133  | 20382  | gb:AF250133.1 / | 0.255 |
| 1450637 | a at | AE binding protein 1             | NM_009636 | 11568  | gb:NM_009636.   | 0.257 |
| 1459903 | at   | sema domain, immunoglobulin      | AA144045  | 20361  | gb:AA144045 /E  | 0.257 |
| 1425896 | a at | fibrillin 1                      | AF007248  | 14118  | gb:AF007248.1 / | 0.259 |

|         |      |                           |           |        |                 |       |
|---------|------|---------------------------|-----------|--------|-----------------|-------|
| 1442332 | at   | Transcribed sequences     | BG794571  |        | gb:BG794571 /D  | 0.262 |
| 1457430 | at   | Transcribed sequence w    | AW488605  |        | gb:AW488605 /I  | 0.264 |
| 1434953 | at   | Adult male pituitary gla  | BB027914  |        | gb:BB027914 /D  | 0.268 |
| 1436333 | a at | synaptojanin 1            | BM232846  | 104015 | gb:BM232846 /I  | 0.270 |
| 1417133 | at   | peripheral myelin prote   | NM_008885 | 18858  | gb:NM_008885.   | 0.272 |
| 1424578 | at   | arrestin domain contain   | BC018501  | 215705 | gb:BC018501.1 / | 0.272 |
| 1426903 | at   | fibronectin type III dom  | BC022140  | 319448 | gb:BC022140.1 / | 0.274 |
| 1458352 | at   | gb:BE951199 /DB XR        | BE951199  |        | gb:BE951199 /D  | 0.274 |
| 1459522 | s at | glycogenin 1              | AU017667  | 27357  | gb:AU017667 /E  | 0.274 |
| 1460550 | at   | cDNA sequence BC051       | BE952757  | 194126 | gb:BE952757 /D  | 0.274 |
| 1437345 | a at | Bernardinelli-Seip cong   | BB223872  | 14705  | gb:BB223872 /D  | 0.275 |
| 1458389 | at   | Transcribed sequences     | BB211886  |        | gb:BB211886 /D  | 0.275 |
| 1417977 | at   | RIKEN cDNA 1300018        | BC027014  | 66892  | gb:NM_025829.   | 0.277 |
| 1423119 | at   | RIKEN cDNA 4930524        | AK016473  | 66832  | gb:AK016473.1   | 0.279 |
| 1418926 | at   | zinc finger homeobox 1    | NM_011546 | 21417  | gb:NM_011546.   | 0.281 |
| 1418718 | at   | chemokine (C-X-C mot      | BC019961  | 66102  | gb:BC019961.1 / | 0.285 |
| 1429510 | at   | RIKEN cDNA 2810410        | AK013071  | 76377  | gb:AK013071.1   | 0.285 |
| 1422948 | s at | histone 1, H4h            | NM_013550 | 69386  | gb:NM_013550.   | 0.289 |
| 1456262 | at   | RNA binding motif pro     | BE446879  | 83486  | gb:BE446879 /D  | 0.289 |
| 1435337 | at   | zinc finger protein 537   | BB150458  | 243931 | gb:BB150458 /D  | 0.289 |
| 1417898 | a at | granzyme A                | NM_010370 | 14938  | gb:NM_010370.   | 0.291 |
| 1427021 | s at | eukaryotic translation in | AK002778  | 66085  | gb:BE457668 /D  | 0.291 |
| 1445534 | at   | Transcribed sequences     | BM206272  |        | gb:BM206272 /I  | 0.291 |
| 1430139 | at   | RIKEN cDNA E13011         | AK021390  | 77871  | gb:AK021390.1   | 0.293 |
| 1441931 | x at | glutathione synthetase    | BB125219  | 14854  | gb:BB125219 /D  | 0.293 |
| 1420933 | a at | eyes absent 3 homolog     | AI746570  | 14050  | gb:AI746570 /D  | 0.295 |
| 1425614 | x at | histocompatibility 2, K   | M83244    | 14972  | gb:M83244.1 /D  | 0.297 |
| 1453101 | at   | RIKEN cDNA 2810402        | AK012967  | 76553  | gb:AK012967.1   | 0.297 |
| 1455494 | at   | procollagen, type I, alp  | BI794771  | 12842  | gb:BI794771 /D  | 0.299 |
| 1428605 | at   | RIKEN cDNA 1810023        | AI227096  | 234388 | gb:AK007589.1   | 0.299 |
| 1424985 | a at | SRY-box containing ge     | BC025171  | 20665  | gb:BC025171.1 / | 0.304 |
| 1429430 | at   | RIKEN cDNA A03001         | AK018402  | 319263 | gb:AK018402.1   | 0.304 |
| 1451168 | a at | Rho GDP dissociation i    | BC004732  | 192662 | gb:BC004732.1 / | 0.306 |
| 1440609 | at   | expressed sequence BB     | BB113015  | 98748  | gb:BB113015 /D  | 0.306 |
| 1442107 | at   | filamin, beta             | BM218614  | 286940 | gb:BM218614 /I  | 0.308 |
| 1421083 | x at | barrier to autointegratio | NM_011793 | 23825  | gb:NM_011793.   | 0.310 |
| 1423236 | at   | UDP-N-acetyl-alpha-D      | BM217066  | 14423  | gb:BG076167 /D  | 0.310 |
| 1424242 | at   | biphenyl hydrolase-like   | BC023146  | 68021  | gb:BC023146.1 / | 0.310 |
| 1426360 | at   | RIKEN cDNA 5730454        | AV328883  | 70579  | gb:BI107105 /D  | 0.310 |
| 1439979 | at   | zinc finger protein 398   | AV372946  | 272347 | gb:AV372946 /E  | 0.310 |
| 1427009 | at   | laminin, alpha 5          | AV224009  | 16776  | gb:AV224009 /E  | 0.312 |
| 1436030 | at   | RIKEN cDNA B43021         | BB730977  | 320508 | gb:BB454834 /D  | 0.316 |
| 1450448 | at   | stanniocalcin 1           | BQ032752  | 20855  | gb:BQ032752 /D  | 0.316 |
| 1460177 | at   | CNDP dipeptidase 2 (m     | NM_023149 | 66054  | gb:NM_023149.   | 0.316 |
| 1434586 | a at | rhosphatidylserine synth  | RR770830  | 27388  | gb:RR770830 /D  | 0.321 |

|         |      |                           |           |        |                 |       |
|---------|------|---------------------------|-----------|--------|-----------------|-------|
| 1449944 | a at | Sec61, alpha subunit 2    | NM_021305 | 57743  | gb:NM_021305.   | 0.332 |
| 1443393 | at   | Clone IMAGE:370935        | BB201890  |        | gb:BB201890 /D  | 0.334 |
| 1425088 | at   | sodium channel, nonvol    | AF112185  | 20276  | gb:AF112185.1 / | 0.337 |
| 1448639 | a at | spermatogenesis associ    | NM_021343 | 57815  | gb:NM_021343.   | 0.342 |
| 1448728 | a at | expreepressed sequenc     | AB026551  | 80859  | gb:AB026551.2 / | 0.342 |
| 1438581 | at   | RIKEN cDNA 493243         | BB225953  | 74392  | gb:BB225953 /D  | 0.342 |
| 1436326 | at   | RAR-related orphan rec    | BB306272  | 19883  | gb:BB306272 /D  | 0.346 |
| 1453681 | at   | ATPase inhibitor          | AK011886  | 11983  | gb:AK011886.1   | 0.346 |
| 1451473 | a at | crystallin, zeta (quinone | BC010479  | 66609  | gb:BC010479.1 / | 0.349 |
| 1421846 | at   | WD repeat and SOCS b      | BM730566  | 59043  | gb:AF072881.1 / | 0.351 |
| 1417932 | at   | interleukin 18            | NM_008360 | 16173  | gb:NM_008360.   | 0.354 |
| 1427040 | at   | kidney cell line derived  | U13371    | 16543  | gb:U13371.1 /D  | 0.354 |
| 1449455 | at   | hemopoietic cell kinase   | NM_010407 | 15162  | gb:NM_010407.   | 0.354 |
| 1445337 | at   | RIKEN cDNA D03000         | BM218262  | 382100 | gb:BM218262 /I  | 0.358 |
| 1454757 | s at | DNA segment, Chr 12,      | AW554405  | 52668  | gb:AW554405 /I  | 0.361 |
| 1416017 | at   | coatomer protein comp     | BC024686  | 54161  | gb:NM_017477.   | 0.363 |
| 1452627 | at   | SUMO/sentrin specific     | BG066990  | 215351 | gb:BG066990 /D  | 0.369 |
| 1456888 | at   | hypothetical protein C2   | BE136572  | 270198 | gb:BE136572 /D  | 0.371 |
| 1416273 | at   | tumor necrosis factor, a  | NM_009396 | 21928  | gb:NM_009396.   | 0.374 |
| 1437906 | x at | thioredoxin-like 1        | AV106191  | 53382  | gb:AV106191 /E  | 0.374 |
| 1418033 | s at | zinc finger protein 535   | NM_026107 | 52712  | gb:NM_026107.   | 0.376 |
| 1424783 | a at | UDP-glucuronosyltrans     | BC019434  | 22236  | gb:BC019434.1 / | 0.376 |
| 1448384 | at   | RIKEN cDNA 231001         | BC018194  | 80294  | gb:BC018194.1 / | 0.384 |
| 1430384 | at   | transducin-like enhance   | AK017548  | 21888  | gb:AK017548.1   | 0.384 |
| 1460350 | at   | RIKEN cDNA 1110018        | BC003443  | 76303  | gb:BC003443.1 / | 0.395 |
| 1417342 | at   | protein phosphatase 1, r  | NM_025800 | 66849  | gb:AV236660 /E  | 0.398 |
| 1422738 | at   | discoïdin domain recep    | NM_022563 | 18214  | gb:NM_022563.   | 0.401 |
| 1438588 | at   | pleiomorphic adenoma      | BB540903  | 22634  | gb:BB540903 /D  | 0.401 |
| 1451049 | at   | B-cell receptor-associat  | AV066734  | 27061  | gb:AV066734 /E  | 0.403 |
| 1428906 | at   | DNA segment, Chr 17,      | BM940130  | 66467  | gb:AA473081 /E  | 0.412 |
| 1418889 | a at | casein kinase 1, delta    | NM_139059 | 104318 | gb:NM_139059.   | 0.420 |
| 1422847 | a at | protein kinase C, delta   | AF251036  | 18753  | gb:AF251036.1 / | 0.420 |
| 1434719 | at   | alpha-2-macroglobulin     | BB185854  | 232345 | gb:BB185854 /D  | 0.426 |
| 1434379 | at   | RIKEN cDNA 281041         | BG868949  | 69247  | gb:BG868949 /D  | 0.457 |
| 1459827 | x at | Hermansky-Pudlak syn      | BB188040  | 192236 | gb:BB188040 /D  | 0.460 |
| 1427486 | at   | protein tyrosine phosph   | AF157628  | 19263  | gb:AF157628.1 / | 0.467 |
| 1421812 | at   | TAP binding protein       | AF043943  | 21356  | gb:AK014566.1   | 0.470 |
| 1439497 | at   | Transcribed sequences     | BG065013  |        | gb:BG065013 /D  | 0.470 |
| 1416747 | at   | expressed sequence AW     | NM_134100 | 106073 | gb:NM_134100.   | 0.483 |
| 1416308 | at   | UDP-glucose dehydrog      | NM_009466 | 22235  | gb:NM_009466.   | 1.395 |
| 1417941 | at   | RIKEN cDNA 160003         | NM_026086 | 67311  | gb:NM_026086.   | 1.729 |
| 1426264 | at   | dihydrolipoamide S-acc    | AV336908  | 235339 | gb:BC026680.1 / | 1.729 |
| 1454772 | at   | expressed sequence AW     | AI327392  | 26371  | gb:BM202766 /I  | 1.729 |
| 1453018 | at   | nuclear VCP-like          | AI143460  | 67459  | gb:AK004676.1   | 1.753 |
| 1448403 | at   | leucyl-tRNA synthetase    | NM_134137 | 107045 | gb:NM_134137    | 1.790 |

|         |      |                           |           |        |                |       |
|---------|------|---------------------------|-----------|--------|----------------|-------|
| 1422631 | at   | aryl-hydrocarbon recep    | BE989096  | 11622  | gb:NM_013464.  | 1.815 |
| 1426243 | at   | cystathionase (cystathio  | BC019483  | 107869 | gb:BC019483.1  | 1.828 |
| 1455686 | at   | Adult male hypothalam     | BB077342  | 338482 | gb:BB077342 /D | 1.828 |
| 1418643 | at   | transmembrane 4 super     | BB807707  | 66109  | gb:NM_025359.  | 1.840 |
| 1448505 | at   | nuclear DNA binding p     | NM_020558 | 57316  | gb:NM_020558.  | 1.840 |
| 1451998 | at   | RIKEN cDNA 493048         | BC024597  | 75812  | gb:BC024597.1  | 1.840 |
| 1452126 | at   | RIKEN cDNA 672048         | BB329288  | 224585 | gb:BB329288 /D | 1.840 |
| 1417132 | at   | cell division cycle 25 h  | C76119    | 12530  | gb:C76119 /DB  | 1.853 |
| 1423577 | at   | RIKEN cDNA C73002         | BE653749  | 105377 | gb:BE653749 /D | 1.853 |
| 1426751 | s at | nucleoporin 107           | BC004655  | 103468 | gb:BC004655.1  | 1.853 |
| 1417646 | a at | sorting nexin 5           | NM_024225 | 69178  | gb:NM_024225.  | 1.866 |
| 1421022 | x at | acylphosphatase 1, eryt   | NM_025421 | 66204  | gb:NM_025421.  | 1.866 |
| 1437520 | a at | pericentrin 2             | BB320388  | 18541  | gb:BB320388 /D | 1.866 |
| 1434910 | at   | RIKEN cDNA 231006         | BE136476  | 69649  | gb:BE136476 /D | 1.866 |
| 1453342 | at   | cell division cycle 40 h  | AK004569  | 71713  | gb:AK004569.1  | 1.866 |
| 1417077 | at   | B-cell receptor-associat  | NM_007530 | 12033  | gb:NM_007530.  | 1.879 |
| 1418229 | s at | histone cell cycle regula | BC018355  | 56748  | gb:BC018355.1  | 1.879 |
| 1418330 | at   | CCCTC-binding factor      | BB836888  | 13018  | gb:NM_007794.  | 1.879 |
| 1450714 | at   | ornithine decarboxylase   | BE626090  | 54375  | gb:BE626090 /D | 1.892 |
| 1452773 | at   | RIKEN cDNA 573049         | AK017729  | 70612  | gb:AK017729.1  | 1.892 |
| 1456194 | a at | gb:BB255468 /DB_XR        | BB255468  |        | gb:BB255468 /D | 1.892 |
| 1434028 | at   | aryl hydrocarbon recep    | BQ174321  | 11864  | gb:BQ174321 /D | 1.892 |
| 1436174 | at   | ATPase family, AAA d      | BM206009  | 70472  | gb:BM206009 /I | 1.892 |
| 1452785 | at   | RIKEN cDNA 170003         | AK012203  | 67105  | gb:AK012203.1  | 1.905 |
| 1427898 | at   | RIKEN cDNA 120001         | BI738010  | 74132  | gb:AK004745.1  | 1.919 |
| 1433901 | at   | GPI-anchored membrar      | AV301998  | 53872  | gb:AV301998 /E | 1.919 |
| 1429205 | at   | RIKEN cDNA 261001         | AK011386  | 72444  | gb:AK011386.1  | 1.919 |
| 1436028 | at   | RIKEN cDNA 111000         | BB795429  | 68579  | gb:BB795429 /D | 1.919 |
| 1436152 | a at | RIKEN cDNA 111000         | AV053864  | 68576  | gb:AV053864 /E | 1.932 |
| 1451244 | a at | zinc finger protein 422   | BC018339  | 67255  | gb:BC018339.1  | 1.932 |
| 1428113 | at   | RIKEN cDNA 493040         | BB278364  | 70551  | gb:AK017580.1  | 1.945 |
| 1439266 | a at | RIKEN cDNA 150000         | AV260647  | 67005  | gb:AV260647 /E | 1.945 |
| 1454060 | a at | neuroblastoma ras onco    | AK010412  | 18176  | gb:AK010412.1  | 1.945 |
| 1455256 | at   | TRAF2 and NCK interg      | AI117633  | 69014  | gb:AI117633 /D | 1.945 |
| 1417810 | a at | protein kinase C and ca   | NM_011862 | 23970  | gb:NM_011862.  | 1.959 |
| 1421344 | a at | ajuba                     | NM_010590 | 16475  | gb:NM_010590.  | 1.959 |
| 1427197 | at   | ataxia telangiectasia an  | AF236887  | 245000 | gb:AF236887.1  | 1.959 |
| 1429155 | at   | RIKEN cDNA 493341         | BQ175454  | 66756  | gb:BQ175454 /D | 1.959 |
| 1433615 | at   | RIKEN cDNA B93006         | BB521146  | 320709 | gb:BB521146 /D | 1.959 |
| 1437424 | at   | RIKEN cDNA C43001         | BG069296  | 214804 | gb:BG069296 /D | 1.959 |
| 1453078 | at   | RIKEN cDNA 843040         | AK018397  | 74520  | gb:AK018397.1  | 1.959 |
| 1415830 | at   | origin recognition comp   | NM_011959 | 26429  | gb:NM_011959.  | 1.972 |
| 1416422 | a at | Sjogren syndrome antig    | BG796845  | 20823  | gb:BM208153 /I | 1.972 |
| 1416423 | x at | Sjogren syndrome antig    | BG796845  | 20823  | gb:BM208153 /I | 1.972 |
| 1419273 | at   | expressed sequence C8     | AV278756  | 19777  | gb:BC023029.1  | 1.972 |

|         |      |                           |           |        |                 |       |
|---------|------|---------------------------|-----------|--------|-----------------|-------|
| 1434394 | at   | Bcl3 binding protein      | AV116077  | 333789 | gb:AV116077 /D  | 1.972 |
| 1416228 | at   | protein (peptidyl-prolyl  | NM_023371 | 23988  | gb:NM_023371.   | 1.986 |
| 1418388 | s_at | RIKEN cDNA 4930548        | NM_023773 | 75339  | gb:NM_023773.   | 1.986 |
| 1423057 | at   | capping protein (actin f  | BI102231  | 12343  | gb:BG175066 /D  | 1.986 |
| 1434561 | at   | additional sex combs lil  | BI648411  | 228790 | gb:BI648411 /DI | 1.986 |
| 1436214 | at   | RIKEN cDNA C43001         | AV023018  | 227227 | gb:AV023018 /D  | 1.986 |
| 1448543 | at   | RIKEN cDNA 2310042        | NM_025531 | 66390  | gb:NM_025531.   | 1.986 |
| 1449740 | s_at | desmoglein 2              | C79957    | 13511  | gb:C79957 /DB   | 1.986 |
| 1452278 | a_at | cDNA sequence BC025       | BG922448  | 209462 | gb:BG922448 /D  | 1.986 |
| 1460404 | at   | RIKEN cDNA 0610007        | BC026917  | 76251  | gb:BC026917.1 / | 1.986 |
| 1428800 | a_at | RIKEN cDNA 3000003        | AK019372  | 78895  | gb:AK019372.1   | 1.986 |
| 1434238 | at   | expressed sequence AI4    | BQ176372  | 105829 | gb:BQ176372 /D  | 1.986 |
| 1437904 | at   | developmentally regula    | BB821609  | 241490 | gb:BB821609 /D  | 1.986 |
| 1455600 | at   | ribosomal protein S3      | BG069767  | 27050  | gb:BG069767 /D  | 1.986 |
| 1415810 | at   | ubiquitin-like, containi  | BB702754  | 18140  | gb:NM_010931.   | 2.000 |
| 1418681 | at   | RIKEN cDNA 4833433        | NM_026247 | 67574  | gb:NM_026247.   | 2.000 |
| 1422752 | at   | RIKEN cDNA 1500004        | BG070121  | 67005  | gb:NM_025901.   | 2.000 |
| 1424511 | at   | serine/threonine kinase   | U80932    | 20878  | gb:U80932.1 /DI | 2.000 |
| 1429043 | at   | RIKEN cDNA 2410004        | BG071121  | 76479  | gb:BB072076 /D  | 2.000 |
| 1437502 | x_at | CD24a antigen             | BB560574  | 12484  | gb:BB560574 /D  | 2.000 |
| 1439271 | x_at | IK cytokine               | AV255179  | 24010  | gb:AV255179 /D  | 2.000 |
| 1428919 | at   | Fgfr1 oncogene partner    | BB667817  | 75296  | gb:BB667817 /D  | 2.000 |
| 1433902 | at   | T-cell activation kelch r | BB469300  | 243574 | gb:BB469300 /D  | 2.000 |
| 1434447 | at   | expressed sequence AI8    | BG060788  | 101160 | gb:BG060788 /D  | 2.000 |
| 1416175 | a_at | voltage-dependent anio    | NM_011696 | 22335  | gb:NM_011696.   | 2.014 |
| 1416773 | at   | wee 1 homolog (S. pom     | NM_009516 | 22390  | gb:BC006852.1 / | 2.014 |
| 1417062 | at   | RIKEN cDNA 2810037        | NM_026034 | 67211  | gb:NM_026034.   | 2.014 |
| 1426558 | x_at | RIKEN cDNA 3100002        | BB283527  | 66376  | gb:BB283527 /D  | 2.014 |
| 1429490 | at   | DNA segment, Chr 2, E     | AK018316  | 51869  | gb:AK018316.1   | 2.014 |
| 1449648 | s_at | RNA polymerase 1-1        | AL024089  | 20016  | gb:AL024089 /D  | 2.014 |
| 1428551 | at   | RIKEN cDNA 2410073        | BG070720  | 73681  | gb:BG070720 /D  | 2.014 |
| 1428561 | at   | RIKEN cDNA 2610002        | AK011292  | 69886  | gb:AK011292.1   | 2.014 |
| 1433547 | s_at | RIKEN cDNA 4921532        | BI660933  | 67429  | gb:BI660933 /DI | 2.014 |
| 1439558 | at   | zinc finger protein 75    | BM729399  | 244713 | gb:BM729399 /I  | 2.014 |
| 1455735 | at   | adaptor-related protein   | AW259574  | 252903 | gb:AW259574 /I  | 2.014 |
| 1416526 | a_at | Parkinson disease (auto   | BC002187  | 57320  | gb:BC002187.1 / | 2.028 |
| 1417019 | a_at | cell division cycle 6 ho  | NM_011799 | 23834  | gb:NM_011799.   | 2.028 |
| 1423192 | at   | paraspeckle protein 1     | BB590675  | 66645  | gb:AK011272.1   | 2.028 |
| 1426895 | at   | zinc finger protein 191   | BB579760  | 59057  | gb:BI666170 /DI | 2.028 |
| 1427075 | s_at | RIKEN cDNA 5330414        | BM117243  | 245867 | gb:BM117243 /I  | 2.028 |
| 1433829 | a_at | heterogeneous nuclear r   | BG064117  | 53379  | gb:C88150 /DB   | 2.028 |
| 1435368 | a_at | ADP-ribosyltransferase    | BB767586  | 11545  | gb:BB767586 /D  | 2.028 |
| 1433794 | at   | expressed sequence AW     | BM211942  | 269255 | gb:BM211942 /I  | 2.028 |
| 1435440 | at   | PDZ domain containing     | BQ175434  | 107368 | gb:BQ175434 /D  | 2.028 |
| 1457674 | at   | RIKEN cDNA D33003         | AV255519  | 271564 | gb:AV255519 /I  | 2.028 |

|         |      |                           |           |        |                 |       |
|---------|------|---------------------------|-----------|--------|-----------------|-------|
| 1416178 | a at | pleckstrin homology do    | NM_013746 | 27276  | gb:NM_013746.   | 2.042 |
| 1418369 | at   | DNA primase, p49 subu     | J04620    | 19075  | gb:J04620.1 /DB | 2.042 |
| 1426682 | at   | RIKEN cDNA A23010         | BM940481  | 104625 | gb:BM114241 /I  | 2.042 |
| 1428247 | at   | RIKEN cDNA 1810012        | BI081895  | 69091  | gb:BI081895 /D  | 2.042 |
| 1433663 | s at | Nuclear cap binding pro   | BQ175324  |        | gb:BQ175324 /D  | 2.042 |
| 1434888 | a at | matrin 3                  | BM219545  | 17184  | gb:BM219545 /I  | 2.042 |
| 1448284 | a at | NADH dehydrogenase        | NM_025523 | 66377  | gb:NM_025523.   | 2.042 |
| 1448493 | at   | polyadenylate-binding p   | NM_026420 | 67869  | gb:NM_026420.   | 2.042 |
| 1450900 | at   | expressed sequence AW     | AV305633  | 104570 | gb:BQ177215 /D  | 2.042 |
| 1453106 | a at | RNA (guanine-7-) meth     | AK015403  | 67897  | gb:AK015403.1   | 2.042 |
| 1417541 | at   | helicase, lymphoid spec   | NM_008234 | 15201  | gb:NM_008234.   | 2.056 |
| 1424629 | at   | breast cancer 1           | U31625    | 12189  | gb:U36475.1 /D  | 2.056 |
| 1436908 | at   | pericentriolar material   | BG076129  | 18536  | gb:BG076129 /D  | 2.056 |
| 1450701 | a at | general transcription fac | NM_022011 | 23894  | gb:NM_022011.   | 2.056 |
| 1454652 | at   | zinc finger protein 265   | AV221867  | 53861  | gb:AV221867 /D  | 2.056 |
| 1436463 | at   | 0 day neonate cerebellu   | AU067666  |        | gb:AU067666 /D  | 2.056 |
| 1455483 | at   | zinc finger protein 148   | AI480666  | 22661  | gb:AI480666 /D  | 2.056 |
| 1416461 | at   | GPI-anchored membrar      | BE981338  | 53872  | gb:NM_016739.   | 2.071 |
| 1419452 | at   | ubiquitin carboxyl-term   | AV313813  | 56207  | gb:NM_019562.   | 2.071 |
| 1423167 | at   | preimplantation protein   | BM937050  | 19070  | gb:AI327347 /D  | 2.071 |
| 1426838 | at   | polymerase (DNA-direc     | AK010805  | 67967  | gb:BB046864 /D  | 2.071 |
| 1437480 | at   | RIKEN cDNA 111000         | BB071833  | 66140  | gb:BB071833 /D  | 2.071 |
| 1450685 | at   | cAMP-regulated phosph     | BE648432  | 59046  | gb:BE648432 /D  | 2.071 |
| 1431930 | x at | RIKEN cDNA 0610009        | AK017718  | 66586  | gb:AK017718.1   | 2.071 |
| 1435339 | at   | potassium channel tetra   | BB091366  | 233107 | gb:BB091366 /D  | 2.071 |
| 1436847 | s at | DNA segment, Chr 4, E     | BB702047  | 52276  | gb:BB702047 /D  | 2.071 |
| 1417493 | at   | B lymphoma Mo-MLV         | M64279    | 12151  | gb:AA217399 /I  | 2.085 |
| 1429062 | at   | kinesin family member     | BG066903  | 16558  | gb:BG066903 /D  | 2.085 |
| 1429171 | a at | RIKEN cDNA 5730507        | BB702347  | 54392  | gb:AV277326 /I  | 2.085 |
| 1448763 | at   | ATPase family, AAA d      | NM_026487 | 67979  | gb:NM_026487.   | 2.085 |
| 1449059 | a at | 3-oxoacid CoA transfer    | NM_024188 | 67041  | gb:NM_024188.   | 2.085 |
| 1428168 | at   | myelin protein zero-like  | AK003513  | 68481  | gb:AK003513.1   | 2.085 |
| 1452820 | at   | WD repeat domain 11       | AK013701  | 207425 | gb:AK013701.1   | 2.085 |
| 1423532 | at   | ring finger protein 44    | AI850285  | 105239 | gb:AI850285 /D  | 2.099 |
| 1426256 | at   | translocator of inner mi  | AF106620  | 21854  | gb:AF106620.1 / | 2.099 |
| 1427061 | at   | RIKEN cDNA 9930104        | BB167067  | 225182 | gb:BB147997 /D  | 2.099 |
| 1434328 | at   | ribosomal protein L15     | BI081163  | 66480  | gb:BM213176 /I  | 2.099 |
| 1436704 | x at | methylenetetrahydrofol    | AV215673  | 108156 | gb:AV215673 /I  | 2.099 |
| 1437947 | x at | voltage-dependent anio    | AV036172  | 22333  | gb:AV036172 /I  | 2.099 |
| 1438510 | a at | histidyl-tRNA syntheta    | BB451746  | 15115  | gb:BB451746 /D  | 2.099 |
| 1452206 | at   | succinate-Coenzyme A      | AK005273  | 20916  | gb:AK005273.1   | 2.099 |
| 1452291 | at   | centaurin, delta 1        | AV375176  | 212285 | gb:AV375176 /I  | 2.099 |
| 1433856 | at   | expressed sequence AW     | AW555814  | 227399 | gb:AW555814 /I  | 2.099 |
| 1438349 | at   | cDNA sequence BC043       | BG069331  | 381067 | gb:BG069331 /D  | 2.099 |
| 1452898 | at   | RIKEN cDNA 2810408        | AK013045  | 76377  | gb:AK013045.1   | 2.099 |

|         |      |                           |           |        |                |       |
|---------|------|---------------------------|-----------|--------|----------------|-------|
| 1418007 | at   | RIKEN cDNA 1810007        | BM932567  | 67367  | gb:NM_026110.  | 2.114 |
| 1423106 | at   | ubiquitin-conjugating e   | AK010432  | 22210  | gb:AK011363.1  | 2.114 |
| 1423982 | at   | FUS interacting protein   | AF060490  | 14105  | gb:AF060490.1  | 2.114 |
| 1425179 | at   | serine hydroxymethyl tr   | AF237702  | 20425  | gb:AF237702.1  | 2.114 |
| 1448356 | at   | ubiquitin-conjugating e   | NM_019912 | 56550  | gb:NM_019912.  | 2.114 |
| 1448361 | at   | tetratricopeptide repeat  | BB833716  | 22129  | gb:NM_009441.  | 2.114 |
| 1448521 | at   | bromodomain containin     | NM_012047 | 26992  | gb:NM_012047.  | 2.114 |
| 1428284 | at   | RIKEN cDNA 8430427        | AK018446  | 241733 | gb:BM120675 /I | 2.114 |
| 1435397 | at   | cDNA sequence BC038       | AV146691  | 270135 | gb:AV146691 /E | 2.114 |
| 1435605 | at   | actin-related protein 3-l | BB125424  | 242894 | gb:BB125424 /D | 2.114 |
| 1456023 | at   | RIKEN cDNA 2210010        | AV377052  | 244721 | gb:AV377052 /E | 2.114 |
| 1415680 | at   | anaphase promoting co     | NM_008569 | 17222  | gb:NM_008569.  | 2.129 |
| 1416150 | a at | splicing factor, arginine | NM_013663 | 20383  | gb:NM_013663.  | 2.129 |
| 1416586 | at   | zinc finger protein 239   | NM_008616 | 22685  | gb:NM_008616.  | 2.129 |
| 1417873 | at   | RIKEN cDNA 2310058        | BC003199  | 103136 | gb:NM_133993.  | 2.129 |
| 1427046 | at   | transcription factor CP2  | BC004783  | 252973 | gb:BC004783.1  | 2.129 |
| 1435630 | s at | acetyl-Coenzyme A ace     | AV148646  | 110460 | gb:AV148646 /E | 2.129 |
| 1438368 | a at | matrin 3                  | BB390675  | 17184  | gb:BB390675 /D | 2.129 |
| 1435396 | at   | expressed sequence C8     | BM218509  | 97823  | gb:BM218509 /I | 2.129 |
| 1435769 | at   | A kinase (PRKA) anch      | AV228342  | 100986 | gb:AV228342 /E | 2.129 |
| 1435836 | at   | RIKEN cDNA D53002         | BB553369  | 228026 | gb:BB553369 /D | 2.129 |
| 1416824 | at   | RIKEN cDNA B23011         | NM_026592 | 68170  | gb:NM_026592.  | 2.144 |
| 1418387 | at   | RIKEN cDNA 4930548        | NM_023773 | 75339  | gb:NM_023773.  | 2.144 |
| 1418715 | at   | pantothenate kinase 1     | BC023496  | 75735  | gb:NM_023792.  | 2.144 |
| 1422823 | at   | epidermal growth facto    | NM_007945 | 13860  | gb:NM_007945.  | 2.144 |
| 1423796 | at   | splicing factor proline/g | AY034062  | 71514  | gb:BE951578 /D | 2.144 |
| 1427901 | at   | mitochondrial ribosoma    | AK004139  | 68735  | gb:AK004139.1  | 2.144 |
| 1428505 | at   | RIKEN cDNA 2310015        | AK009370  | 66365  | gb:AK009370.1  | 2.144 |
| 1434620 | s at | expressed sequence AV     | AV113735  | 225358 | gb:AV113735 /E | 2.144 |
| 1436783 | x at | tyrosine 3-monooxygen     | AV021552  | 54401  | gb:AV021552 /E | 2.144 |
| 1438610 | a at | crystallin, zeta          | BB793369  | 12972  | gb:BB793369 /D | 2.144 |
| 1438835 | a at | U5 small nuclear ribonu   | BB315355  | 20624  | gb:BB315355 /D | 2.144 |
| 1448627 | s at | PDZ binding kinase        | NM_023209 | 52033  | gb:NM_023209.  | 2.144 |
| 1449099 | at   | LPS-responsive beige-l    | NM_030695 | 80877  | gb:NM_030695.  | 2.144 |
| 1435236 | at   | RIKEN cDNA A63001         | BB323288  | 245695 | gb:BB323288 /D | 2.144 |
| 1438029 | at   | RIKEN cDNA 4930535        | BB817800  | 75137  | gb:BB817800 /D | 2.144 |
| 1454843 | at   | phosphoribosyl pyropho    | BM934034  | 110639 | gb:BM934034 /I | 2.144 |
| 1418996 | a at | RIKEN cDNA 4930469        | BC021522  | 67636  | gb:BC021522.1  | 2.158 |
| 1422444 | at   | integrin alpha 6          | BM935811  | 16403  | gb:NM_008397.  | 2.158 |
| 1424895 | at   | G-protein signalling mo   | BC021308  | 76123  | gb:BC021308.1  | 2.158 |
| 1433834 | at   | RIKEN cDNA F830029        | BQ176049  | 223455 | gb:BQ176049 /D | 2.158 |
| 1436802 | at   | interleukin enhancer bin  | BG069530  | 16201  | gb:BG069530 /D | 2.158 |
| 1451349 | at   | cDNA sequence BC020       | BC020077  | 230500 | gb:BC020077.1  | 2.158 |
| 1452712 | at   | RIKEN cDNA 2610510        | AK011930  | 229279 | gb:AK011930.1  | 2.158 |
| 1428876 | at   | signal recognition partic | BM942773  | 66661  | gb:BF180868 /D | 2.158 |



|         |      |                           |           |        |                 |       |
|---------|------|---------------------------|-----------|--------|-----------------|-------|
| 1439510 | at   | shugoshin-like 1 (S. po   | BB410537  | 72415  | gb:BB410537 /D  | 2.158 |
| 1416161 | at   | RAD21 homolog (S. po      | AF332085  | 19357  | gb:NM_009009.   | 2.173 |
| 1417327 | at   | caveolin 2                | NM_016900 | 12390  | gb:NM_016900.   | 2.173 |
| 1418342 | at   | replication factor C 1    | U01222    | 19687  | gb:NM_011258.   | 2.173 |
| 1420592 | a at | acidic (leucine-rich) nu  | NM_023210 | 66471  | gb:NM_023210.   | 2.173 |
| 1422032 | a at | RIKEN cDNA 3110005        | NM_022985 | 65098  | gb:AK002775.1   | 2.173 |
| 1424568 | at   | RIKEN cDNA 6330415        | BC007185  | 70747  | gb:AV234585 /E  | 2.173 |
| 1426675 | at   | DNA segment, Chr 16,      | BB225670  | 28185  | gb:BC025450.1 / | 2.173 |
| 1427173 | a at | mitochondrial ribosoma    | Y17852    | 14548  | gb:Y17852.1 /DI | 2.173 |
| 1428069 | at   | cell division cycle assoc | AK011289  | 66953  | gb:AK011289.1   | 2.173 |
| 1436884 | x at | Ewing sarcoma homolo      | BB699868  | 14030  | gb:BB699868 /D  | 2.173 |
| 1454947 | a at | cDNA sequence BC002       | BE335796  | 79560  | gb:BE335796 /D  | 2.173 |
| 1428546 | at   | synaptotagmin binding,    | AK019500  | 56403  | gb:AK019500.1   | 2.173 |
| 1434721 | at   | RIKEN cDNA 1110001        | AV378849  | 71782  | gb:AV378849 /E  | 2.173 |
| 1443733 | x at | polymerase (DNA-direc     | C85233    | 67967  | gb:C85233 /DB   | 2.173 |
| 1447551 | x at | latrophilin 3             | BB274232  | 319387 | gb:BB274232 /D  | 2.173 |
| 1457072 | at   | 15 days embryo head cl    | BF731393  |        | gb:BF731393 /D  | 2.173 |
| 1459850 | x at | glycine receptor, beta st | BB345174  | 14658  | gb:BB345174 /D  | 2.173 |
| 1420879 | a at | tyrosine 3-monooxygen     | NM_018753 | 54401  | gb:BQ175227 /E  | 2.189 |
| 1422806 | x at | inhibitor of growth fam   | BB020556  | 71777  | gb:BB020556 /D  | 2.189 |
| 1427120 | at   | zinc finger protein 26    | AV346442  | 22688  | gb:AV346442 /E  | 2.189 |
| 1435087 | at   | cDNA sequence BC039       | BI409907  | 230761 | gb:BI409907 /DI | 2.189 |
| 1437309 | a at | replication protein A1    | BB491281  | 68275  | gb:BB491281 /D  | 2.189 |
| 1439260 | a at | ectonucleotide pyropho    | BB039510  | 209558 | gb:BB039510 /D  | 2.189 |
| 1449708 | s at | checkpoint kinase 1 hom   | C85740    | 12649  | gb:C85740 /DB   | 2.189 |
| 1451217 | a at | RIKEN cDNA 1500034        | BC008259  | 66541  | gb:BC008259.1 / | 2.189 |
| 1451649 | a at | RIKEN cDNA 2410118        | BC004071  | 73674  | gb:BC004071.1 / | 2.189 |
| 1416185 | a at | alcohol dehydrogenase     | NM_007410 | 11532  | gb:NM_007410.   | 2.204 |
| 1418217 | at   | non-metastatic cells 7, r | NM_138314 | 171567 | gb:NM_138314.   | 2.204 |
| 1419645 | at   | cleavage stimulation fac  | BM120662  | 108062 | gb:BM120662 /E  | 2.204 |
| 1419724 | at   | ectodysplasin-A recept    | NM_010100 | 13608  | gb:NM_010100.   | 2.204 |
| 1423755 | at   | zinc finger, CCHC dom     | BC013555  | 70650  | gb:BC013555.1 / | 2.204 |
| 1429063 | s at | kinesin family member     | BG066903  | 16558  | gb:BG066903 /D  | 2.204 |
| 1448777 | at   | minichromosome maint      | NM_008564 | 17216  | gb:NM_008564.   | 2.204 |
| 1454993 | a at | splicing factor, arginine | BB492363  | 20383  | gb:BB492363 /D  | 2.204 |
| 1428231 | at   | RIKEN cDNA 4733401        | BB425379  | 66698  | gb:BE986912 /D  | 2.204 |
| 1440162 | x at | hypothetical protein A6   | BB446560  | 328187 | gb:BB446560 /D  | 2.204 |
| 1416118 | at   | RIKEN cDNA 2310035        | NM_025863 | 66949  | gb:NM_025863.   | 2.219 |
| 1417233 | at   | coiled-coil-helix-coiled  | NM_133928 | 72170  | gb:NM_133928.   | 2.219 |
| 1418442 | at   | exportin 1, CRM1 hom      | BC025628  | 103573 | gb:NM_134014.   | 2.219 |
| 1419258 | at   | transcription elongation  | BC006022  | 21399  | gb:BC006022.1 / | 2.219 |
| 1420829 | a at | tyrosine 3-monooxygen     | NM_011739 | 22630  | gb:AW536266 /E  | 2.219 |
| 1424828 | a at | fumarate hydratase 1      | BC006048  | 14194  | gb:BC006048.1 / | 2.219 |
| 1426752 | at   | PHD finger protein 17     | BG065238  | 269424 | gb:AW551496 /E  | 2.219 |
| 1428453 | at   | RIKEN cDNA 4930487        | AK017805  | 70646  | gb:AK017805.1   | 2.219 |

|         |      |                           |           |        |                |       |
|---------|------|---------------------------|-----------|--------|----------------|-------|
| 1428386 | at   | acyl-CoA synthetase lo    | AK012088  | 74205  | gb:AK012088.1  | 2.219 |
| 1429625 | at   | RIKEN cDNA 2900054        | BM202541  | 73049  | gb:BM202541 /I | 2.219 |
| 1434451 | at   | Transcribed sequence w    | AA216953  |        | gb:AA216953 /I | 2.219 |
| 1436914 | at   | 16 days neonate thymus    | BB524458  |        | gb:BB524458 /D | 2.219 |
| 1416532 | at   | expressed sequence AI4    | NM_133901 | 100683 | gb:NM_133901.  | 2.235 |
| 1418334 | at   | expressed sequence AA     | NM_013726 | 27214  | gb:NM_013726.  | 2.235 |
| 1421750 | a at | von Hippel-Lindau bind    | NM_011692 | 22327  | gb:NM_011692.  | 2.235 |
| 1423051 | at   | heterogeneous nuclear r   | BF228203  | 51810  | gb:BF136535 /D | 2.235 |
| 1423767 | at   | RIKEN cDNA 2810410        | BC002240  | 66310  | gb:BC002240.1  | 2.235 |
| 1438938 | x at | B-cell receptor-associat  | AV212294  | 12034  | gb:AV212294 /I | 2.235 |
| 1452831 | s at | phosphoribosyl pyropho    | AV305746  | 231327 | gb:AV305746 /I | 2.235 |
| 1436102 | at   | hypothetical protein C5   | BB425408  | 331041 | gb:BB425408 /D | 2.235 |
| 1436516 | at   | RIKEN cDNA 1110065        | AV246754  | 68904  | gb:AV246754 /I | 2.235 |
| 1444041 | at   | expressed sequence AU     | AU041133  | 103369 | gb:AU041133 /I | 2.235 |
| 1452737 | at   | RIKEN cDNA 2810008        | AK012692  | 75616  | gb:AK012692.1  | 2.235 |
| 1453271 | at   | RIKEN cDNA 4932409        | AK003209  | 75725  | gb:AK003209.1  | 2.235 |
| 1416462 | at   | GPI-anchored membrar      | BE981338  | 53872  | gb:AK011150.1  | 2.250 |
| 1419286 | s at | carnitine deficiency-ass  | NM_009879 | 12589  | gb:NM_009879.  | 2.250 |
| 1434235 | at   | solute carrier family 20  | BB765719  | 20516  | gb:BB765719 /D | 2.250 |
| 1434612 | s at | RIKEN cDNA 9330180        | BE947961  | 100752 | gb:BQ032471 /D | 2.250 |
| 1435164 | s at | ubiquitin-activating enz  | AW210753  | 22200  | gb:AW210753 /I | 2.250 |
| 1439262 | x at | RIKEN cDNA 2310001        | BB221125  | 71881  | gb:BB221125 /D | 2.250 |
| 1448896 | at   | phosphatidylinositol gly  | NM_008838 | 18701  | gb:NM_008838.  | 2.250 |
| 1456600 | a at | ring finger protein 7     | AV047821  | 19823  | gb:AV047821 /I | 2.250 |
| 1428727 | at   | RIKEN cDNA 4631422        | AK014527  | 70799  | gb:AK014527.1  | 2.250 |
| 1429771 | at   | RIKEN cDNA 3110073        | AK014252  | 73201  | gb:AK014252.1  | 2.250 |
| 1457687 | at   | B-cell leukemia/lympho    | BI664467  | 12043  | gb:BI664467 /D | 2.250 |
| 1415849 | s at | stathmin 1                | BC010581  | 16765  | gb:BC010581.1  | 2.266 |
| 1416280 | at   | ubiquitin-like 1 (sentrin | NM_016682 | 50995  | gb:NM_016682.  | 2.266 |
| 1416319 | at   | adenosine kinase          | NM_134079 | 11534  | gb:NM_134079.  | 2.266 |
| 1417125 | at   | S-adenosylhomocystein     | NM_016661 | 269378 | gb:NM_016661.  | 2.266 |
| 1417737 | at   | mitochondrial ribosoma    | NM_020560 | 57312  | gb:NM_020560.  | 2.266 |
| 1427144 | at   | RIKEN cDNA 2810036        | BQ176589  | 72692  | gb:BQ176589 /D | 2.266 |
| 1434767 | at   | expressed sequence C79    | BE951628  | 217653 | gb:BE951628 /D | 2.266 |
| 1434883 | at   | RIKEN cDNA 2610103        | AV083741  | 67154  | gb:BM206088 /I | 2.266 |
| 1435430 | at   | RIKEN cDNA B23030         | BM200437  | 216131 | gb:BM200437 /I | 2.266 |
| 1438171 | x at | RIKEN cDNA 0610012        | BB056666  | 59052  | gb:BB056666 /D | 2.266 |
| 1449095 | at   | vacuolar protein sorting  | NM_139061 | 245944 | gb:NM_139061.  | 2.266 |
| 1452197 | at   | SMC4 structural mainte    | AV172948  | 70099  | gb:AV172948 /I | 2.266 |
| 1447277 | s at | prenylcysteine oxidase    | BB785407  | 66881  | gb:BB785407 /D | 2.266 |
| 1415855 | at   | kit ligand                | BB815530  | 17311  | gb:NM_013598.  | 2.282 |
| 1422889 | at   | protocadherin 18          | BM218630  | 73173  | gb:NM_130448.  | 2.282 |
| 1428061 | at   | histidine aminotransfer   | AK014330  | 107435 | gb:AK014330.1  | 2.282 |
| 1449036 | at   | ring finger protein 128   | AK004847  | 66889  | gb:AK004847.1  | 2.282 |
| 1428512 | at   | RIKEN cDNA 2700087        | AK012577  | 70237  | gb:AK012577.1  | 2.282 |

|         |      |                            |           |        |                 |       |
|---------|------|----------------------------|-----------|--------|-----------------|-------|
| 1455323 | at   | RB-associated KRAB r       | BB446066  | 57782  | gb:BB446066 /D  | 2.282 |
| 1455359 | at   | RIKEN cDNA C13008          | BB794593  | 226829 | gb:BB794593 /D  | 2.282 |
| 1456311 | x_at | RIKEN cDNA 2410004         | AV215583  | 71988  | gb:AV215583 /I  | 2.282 |
| 1418988 | at   | peroxisome biogenesis      | NM_008822 | 18634  | gb:NM_008822.   | 2.297 |
| 1419397 | at   | polymerase (DNA direc      | NM_008892 | 18968  | gb:NM_008892.   | 2.297 |
| 1428326 | s_at | heat-responsive protein    | AK005016  | 15473  | gb:AK005016.1   | 2.297 |
| 1434392 | at   | ubiquitin specific prote   | BM235696  | 17847  | gb:AV016345 /I  | 2.297 |
| 1437611 | x_at | kinesin family member      | BB104669  | 73804  | gb:BB104669 /D  | 2.297 |
| 1450194 | a_at | myeloblastosis oncogen     | NM_033597 | 17863  | gb:NM_033597.   | 2.297 |
| 1451521 | x_at | Williams-Beuren syndr      | BC014796  | 22384  | gb:BC014796.1 / | 2.297 |
| 1452061 | s_at | spermatid perinuclear R    | AK006314  | 20744  | gb:AK006314.1   | 2.297 |
| 1452192 | at   | cDNA sequence BC053        | BM502329  | 234344 | gb:BM502329 /I  | 2.297 |
| 1435070 | at   | AE binding protein 2       | BQ174632  | 11569  | gb:BQ174632 /D  | 2.297 |
| 1454952 | s_at | RIKEN cDNA B13005          | BG069311  | 78658  | gb:BG069311 /D  | 2.297 |
| 1415794 | a_at | spindlin                   | BM228780  | 20729  | gb:NM_011462.   | 2.313 |
| 1426956 | a_at | transformation related p   | AJ414734  | 27223  | gb:AJ414734.1 / | 2.313 |
| 1452359 | at   | expressed sequence AA      | BI248354  | 100532 | gb:BI248354 /D  | 2.313 |
| 1455012 | s_at | tripartite motif protein 3 | BM119247  | 68729  | gb:BM119247 /I  | 2.313 |
| 1434030 | at   | cDNA sequence BC034        | BG068714  | 207704 | gb:BG068714 /D  | 2.313 |
| 1434870 | at   | RIKEN cDNA 2810004         | BB121003  | 66523  | gb:BB121003 /D  | 2.313 |
| 1418209 | a_at | profilin 2                 | NM_019410 | 18645  | gb:NM_019410.   | 2.329 |
| 1419912 | s_at | serine/threonine kinase    | AW557906  | 20901  | gb:AW557906 /I  | 2.329 |
| 1424136 | a_at | peptidyl prolyl isomera    | BC016565  | 66101  | gb:BC016565.1 / | 2.329 |
| 1424227 | at   | polymerase (RNA) III (     | AK019868  | 78929  | gb:BC010793.1   | 2.329 |
| 1426473 | at   | DnaJ (Hsp40) homolog       | BM942465  | 108671 | gb:BM942465 /I  | 2.329 |
| 1426578 | s_at | SNAP-associated prote      | BB667523  | 20615  | gb:BB473485 /D  | 2.329 |
| 1433946 | at   | zinc finger protein inter  | BE824681  | 22775  | gb:BE824681 /D  | 2.329 |
| 1448405 | a_at | CREBBP/EP300 inhibi        | BC010712  | 58521  | gb:NM_025613.   | 2.329 |
| 1451251 | at   | amyloid beta precursor     | BC018442  | 66884  | gb:BC018442.1   | 2.329 |
| 1451968 | at   | X-ray repair compleme      | AF166486  | 22596  | gb:AF166486.1 / | 2.329 |
| 1453928 | a_at | Sjogren syndrome antig     | AK017822  | 20823  | gb:AK017822.1   | 2.329 |
| 1434267 | at   | NIMA (never in mitosis     | BG069735  | 18004  | gb:BG069735 /D  | 2.329 |
| 1434294 | at   | cDNA sequence BC031        | BB183166  | 245622 | gb:BB183166 /D  | 2.329 |
| 1436125 | at   | DNA segment, Chr 16,       | AV381575  | 67102  | gb:AV381575 /I  | 2.329 |
| 1446748 | at   | RIKEN cDNA 2010007         | BB483585  | 69849  | gb:BB483585 /D  | 2.329 |
| 1417910 | at   | cyclin A2                  | X75483    | 12428  | gb:NM_009828.   | 2.346 |
| 1420093 | s_at | heterogeneous nuclear r    | AU015266  | 50926  | gb:AU015266 /I  | 2.346 |
| 1433543 | at   | anillin, actin binding pr  | BI690018  | 68743  | gb:BI690018 /D  | 2.346 |
| 1433903 | at   | expressed sequence AU      | BM227771  | 328099 | gb:BM227771 /I  | 2.346 |
| 1438092 | x_at | H2A histone family, me     | AV003424  | 51788  | gb:AV003424 /I  | 2.346 |
| 1428886 | at   | retinoblastoma binding     | AK016773  | 213464 | gb:AK016773.1   | 2.346 |
| 1429013 | at   | RIKEN cDNA 2900002         | AK021126  | 78283  | gb:AK021126.1   | 2.346 |
| 1433623 | at   | zinc finger protein 367    | BE629588  | 238673 | gb:BE629588 /D  | 2.346 |
| 1442465 | s_at | spermatid perinuclear R    | AV377824  | 20744  | gb:AV377824 /I  | 2.346 |
| 1455425 | at   | Clone IMAGE:450768         | BG071655  |        | gb:BG071655 /I  | 2.346 |

|         |      |                           |           |        |                 |       |
|---------|------|---------------------------|-----------|--------|-----------------|-------|
| 1437278 | a at | ubiquitin-like 1 (sentrin | BB040804  | 50995  | gb:BB040804 /D  | 2.362 |
| 1448720 | at   | RIKEN cDNA 2610040        | NM_024194 | 67144  | gb:NM_024194.   | 2.362 |
| 1428251 | at   | RIKEN cDNA 4931400        | AK016419  | 74355  | gb:AK016419.1   | 2.362 |
| 1428754 | at   | RIKEN cDNA 3300001        | BB752934  | 66926  | gb:BB752934 /D  | 2.362 |
| 1454764 | s at | solute carrier family 38  | BF165681  | 105727 | gb:BF165681 /D  | 2.362 |
| 1456087 | at   | RIKEN cDNA 9430022        | BB089547  | 320503 | gb:BB089547 /D  | 2.362 |
| 1456633 | at   | RIKEN cDNA 6330504        | BB313276  | 329038 | gb:BB313276 /D  | 2.362 |
| 1424156 | at   | retinoblastoma-like 1 (p  | U27177    | 19650  | gb:U27177.1 /DI | 2.378 |
| 1448938 | at   | replication protein A3    | NM_026632 | 68240  | gb:NM_026632.   | 2.378 |
| 1428304 | at   | RIKEN cDNA 2410004        | AK010391  | 71988  | gb:AK010391.1   | 2.378 |
| 1436161 | at   | androgen-induced proli    | BB442341  | 100710 | gb:BB442341 /D  | 2.378 |
| 1437422 | at   | sema domain, seven thr    | AV375653  | 20356  | gb:AV375653 /I  | 2.378 |
| 1419267 | at   | nuclear transcription fac | AV250496  | 18045  | gb:AV250496 /I  | 2.395 |
| 1419700 | a at | prominin 1                | NM_008935 | 19126  | gb:NM_008935.   | 2.395 |
| 1438172 | x at | RIKEN cDNA 4933424        | BB091183  | 71151  | gb:BB091183 /D  | 2.395 |
| 1438554 | x at | Williams-Beuren syndr     | AU044391  | 22384  | gb:AU044391 /I  | 2.395 |
| 1449008 | at   | tubby-like protein 3      | NM_011657 | 22158  | gb:NM_011657.   | 2.395 |
| 1455036 | s at | RIKEN cDNA 1810004        | AV124743  | 68197  | gb:AV124743 /I  | 2.395 |
| 1428522 | at   | transcription terminatio  | BB283807  | 74044  | gb:AK014607.1   | 2.395 |
| 1434682 | at   | RIKEN cDNA 6430601        | AV347367  | 228491 | gb:AV347367 /I  | 2.395 |
| 1437873 | at   | RIKEN cDNA 6030490        | BB044772  | 240064 | gb:BB044772 /D  | 2.395 |
| 1419033 | at   | RIKEN cDNA 2610018        | AW556821  | 70415  | gb:AW556821 /I  | 2.412 |
| 1421943 | at   | transforming growth fac   | M92420    | 21802  | gb:U65016.1 /DI | 2.412 |
| 1423565 | at   | phosphoribosylaminoin     | BM207712  | 67054  | gb:BM207712 /I  | 2.412 |
| 1434776 | at   | sema domain, seven thr    | BQ176610  | 20356  | gb:BQ176610 /D  | 2.412 |
| 1448379 | at   | POT1-like telomere enc    | NM_133931 | 101185 | gb:NM_133931.   | 2.412 |
| 1424085 | at   | NADH dehydrogenase        | BC011114  | 17992  | gb:BC011114.1 / | 2.428 |
| 1427965 | at   | single-stranded DNA bi    | BG073014  | 381760 | gb:BG073014 /D  | 2.428 |
| 1427971 | at   | cDNA sequence BC027       | BB622571  | 214498 | gb:BB321838 /D  | 2.428 |
| 1429491 | s at | DNA segment, Chr 2, E     | AK018316  | 51869  | gb:AK018316.1   | 2.428 |
| 1429739 | a at | zinc finger protein 278   | AK018372  | 56218  | gb:AK018372.1   | 2.428 |
| 1433552 | a at | polymerase (RNA) II (I    | BQ177004  | 231329 | gb:BQ177004 /D  | 2.428 |
| 1438991 | x at | protein phosphatase 2 (   | BB109449  | 51792  | gb:BB109449 /D  | 2.428 |
| 1449200 | at   | nucleoporin 155           | BG073833  | 170762 | gb:BG073833 /D  | 2.428 |
| 1452209 | at   | plakophilin 4             | AV286396  | 227937 | gb:AV286396 /I  | 2.428 |
| 1456730 | x at | expressed sequence C79    | BB094081  | 56456  | gb:BB094081 /D  | 2.428 |
| 1429394 | at   | RIKEN cDNA A13001         | BB025778  | 319266 | gb:BB025778 /D  | 2.428 |
| 1433751 | at   | solute carrier family 39  | BM250411  | 227059 | gb:BM250411 /I  | 2.428 |
| 1433781 | a at | claudin 12                | AW554231  | 64945  | gb:AW554231 /I  | 2.428 |
| 1416544 | at   | enhancer of zeste homo    | NM_007971 | 14056  | gb:NM_007971.   | 2.445 |
| 1424206 | at   | SWI/SNF related, matr     | BI661719  | 93762  | gb:AF375046.1 / | 2.445 |
| 1428485 | at   | carbonic anhydrase 12     | AK009873  | 76459  | gb:AK009873.1   | 2.445 |
| 1435103 | x at | phenylalanine-tRNA sy     | AV116958  | 23874  | gb:AV116958 /I  | 2.445 |
| 1437033 | a at | S-phase kinase-associat   | BB784099  | 27401  | gb:BB784099 /D  | 2.445 |
| 1451125 | at   | cDNA sequence BC017       | BC017133  | 232164 | gb:BC017133.1   | 2.445 |

|         |      |                           |           |        |                 |       |
|---------|------|---------------------------|-----------|--------|-----------------|-------|
| 1435676 | at   | hypothetical protein D0   | BB445523  | 214552 | gb:BB445523 /D  | 2.445 |
| 1447363 | s at | budding uninhibited by    | AU045529  | 12236  | gb:AU045529 /I  | 2.445 |
| 1416607 | at   | RIKEN cDNA 4931406        | AI461712  | 70984  | gb:NM_133732.   | 2.462 |
| 1417239 | at   | centrin 3                 | BC002162  | 12626  | gb:BC002162.1   | 2.462 |
| 1417313 | at   | LSM7 homolog, U6 sm       | NM_025349 | 66094  | gb:NM_025349.   | 2.462 |
| 1422592 | at   | catenin delta 2           | NM_008729 | 18163  | gb:NM_008729.   | 2.462 |
| 1426760 | at   | importin 8                | AW413962  | 320727 | gb:BC027360.1   | 2.462 |
| 1434896 | at   | zinc finger protein 422   | BM230211  | 77652  | gb:BM230211 /I  | 2.462 |
| 1436993 | x at | profilin 2                | BB560492  | 18645  | gb:BB560492 /D  | 2.462 |
| 1438091 | a at | H2A histone family, me    | AV003424  | 51788  | gb:AV003424 /I  | 2.462 |
| 1454607 | s at | phosphoserine aminotra    | AV216491  | 107272 | gb:AV216491 /I  | 2.462 |
| 1429759 | at   | ribosomal protein S6 ki   | BB449218  | 67071  | gb:BB402211 /D  | 2.462 |
| 1433762 | at   | RIKEN cDNA C63004         | BB182501  | 68285  | gb:BB182501 /D  | 2.462 |
| 1434286 | at   | trichorhinophalangeal s   | BQ176054  | 83925  | gb:BQ176054 /D  | 2.462 |
| 1436071 | at   | Transcribed sequences     | BQ175953  |        | gb:BQ175953 /D  | 2.462 |
| 1454625 | at   | PHD finger protein 6      | BG073473  | 70998  | gb:BG073473 /D  | 2.462 |
| 1416866 | at   | blocked early in transp   | NM_009748 | 12068  | gb:BC005572.1   | 2.479 |
| 1418083 | at   | RIKEN cDNA 0610009        | NM_025319 | 66050  | gb:NM_025319.   | 2.479 |
| 1421317 | x at | myeloblastosis oncog      | NM_033597 | 17863  | gb:NM_033597.   | 2.479 |
| 1434079 | s at | minichromosome maint      | BB699415  | 17216  | gb:BB699415 /D  | 2.479 |
| 1435602 | at   | selenophosphate synthe    | BE200310  | 20768  | gb:BE200310 /D  | 2.479 |
| 1454785 | at   | dual specificity phosph   | BE951717  | 72102  | gb:BE951717 /D  | 2.479 |
| 1434365 | a at | similar to hypothetical   | BB093351  | 381306 | gb:BB093351 /D  | 2.479 |
| 1456698 | s at | heterogeneous nuclear r   | BB711246  | 50926  | gb:BB711246 /D  | 2.479 |
| 1416151 | at   | splicing factor, arginine | NM_013663 | 20383  | gb:BB470806 /D  | 2.497 |
| 1422824 | s at | epidermal growth facto    | NM_007945 | 13860  | gb:NM_007945.   | 2.497 |
| 1423531 | a at | heterogeneous nuclear r   | BI663320  | 15382  | gb:BI663320 /DI | 2.497 |
| 1423747 | a at | RIKEN cDNA D53002         | BC027196  | 228026 | gb:BC027196.1   | 2.497 |
| 1424020 | at   | ADP-ribosylation facto    | BB837198  | 65103  | gb:BC019550.1   | 2.497 |
| 1435669 | at   | RIKEN cDNA C53003         | BB404446  | 328977 | gb:BB404446 /D  | 2.497 |
| 1435043 | at   | phospholipase C, beta 1   | BB794831  | 18795  | gb:BB794831 /D  | 2.497 |
| 1437375 | at   | 0 day neonate thymus c    | BB745175  |        | gb:BB745175 /D  | 2.497 |
| 1416558 | at   | maternal embryonic leu    | NM_010790 | 17279  | gb:NM_010790.   | 2.514 |
| 1418308 | at   | Hus1 homolog (S. pom      | NM_008316 | 15574  | gb:NM_008316.   | 2.514 |
| 1423758 | at   | RIKEN cDNA E43003         | BG069656  | 23881  | gb:BG518564 /D  | 2.514 |
| 1424292 | at   | DEP domain containing     | BC005799  | 76131  | gb:BC005799.1   | 2.514 |
| 1460179 | at   | DnaJ (Hsp40) homolog      | BF141076  | 15502  | gb:NM_008298.   | 2.514 |
| 1434217 | at   | RIKEN cDNA C33001         | BB400635  | 215476 | gb:AV283764 /I  | 2.514 |
| 1438018 | at   | hook homolog 1 (Dros      | BB463518  | 77963  | gb:BB463518 /D  | 2.514 |
| 1417506 | at   | geminin                   | NM_020567 | 57441  | gb:NM_020567.   | 2.532 |
| 1417719 | at   | sin3 associated polypep   | NM_021788 | 60406  | gb:NM_021788.   | 2.532 |
| 1425476 | at   | procollagen, type IV, al  | BM250666  | 12830  | gb:BM250666 /I  | 2.532 |
| 1434909 | at   | RIKEN cDNA C03000         | BF462770  | 100146 | gb:BF462770 /D  | 2.532 |
| 1416706 | at   | ribulose-5-phosphate-3    | BG916066  | 66646  | gb:BC019126.1   | 2.549 |
| 1418727 | at   | nucleonorin 155           | BG073833  | 170767 | gb:NM_133227    | 2.549 |

|         |      |                           |           |        |                 |       |
|---------|------|---------------------------|-----------|--------|-----------------|-------|
| 1420907 | at   | CD2-associated protein    | BB398671  | 12488  | gb:BM201213 /I  | 2.567 |
| 1422445 | at   | integrin alpha 6          | BM935811  | 16403  | gb:BM935811 /I  | 2.567 |
| 1424046 | at   | budding uninhibited by    | AF002823  | 12235  | gb:AF002823.1 / | 2.567 |
| 1429295 | s at | thyroid hormone recept    | AK010336  | 69716  | gb:AK010336.1   | 2.567 |
| 1452241 | at   | RIKEN cDNA 2810429        | BC007170  | 235559 | gb:BC007170.1 / | 2.567 |
| 1456393 | at   | programmed cell death     | AI642124  | 18569  | gb:AI642124 /D  | 2.567 |
| 1418210 | at   | profilin 2                | NM_019410 | 18645  | gb:NM_019410.   | 2.585 |
| 1454694 | a at | topoisomerase (DNA) II    | BM211413  | 21973  | gb:BM211413 /I  | 2.585 |
| 1454991 | at   | 7 days neonate cerebell   | BB264620  |        | gb:BI080151 /D  | 2.585 |
| 1418158 | at   | transformation related p  | NM_011641 | 22061  | gb:NM_011641.   | 2.603 |
| 1419749 | at   | DNA methyltransferase     | BB010597  | 13434  | gb:NM_010067.   | 2.603 |
| 1425425 | a at | Wnt inhibitory factor 1   | BC004048  | 24117  | gb:BC004048.1 / | 2.621 |
| 1428502 | at   | ARP6 actin-related prot   | AK008409  | 67019  | gb:AK008409.1   | 2.621 |
| 1430147 | a at | RIKEN cDNA 4930553        | AK016109  | 75316  | gb:AK016109.1   | 2.621 |
| 1439251 | at   | iduronidase, alpha-L-     | BI133445  | 15932  | gb:BI133445 /D  | 2.621 |
| 1449581 | at   | EMI domain containing     | NM_080595 | 140703 | gb:NM_080595.   | 2.621 |
| 1452661 | at   | transferrin receptor      | AK011596  | 22042  | gb:AK011596.1   | 2.621 |
| 1433746 | at   | WD repeat domain 3        | BG063575  | 269470 | gb:BG063575 /D  | 2.621 |
| 1434001 | at   | RIKEN cDNA 2210019        | AV004411  | 70387  | gb:AV004411 /I  | 2.621 |
| 1435435 | at   | cortactin binding protei  | BB357580  | 30785  | gb:BB357580 /D  | 2.621 |
| 1437187 | at   | E2F transcription factor  | BG069355  | 52679  | gb:BG069355 /D  | 2.621 |
| 1454846 | at   | expressed sequence AW     | AV227804  | 105372 | gb:AV227804 /I  | 2.621 |
| 1454877 | at   | SERTA domain contain      | BQ174721  | 214791 | gb:BQ174721 /D  | 2.621 |
| 1416299 | at   | Shc SH2-domain bindin     | NM_011369 | 20419  | gb:NM_011369.   | 2.639 |
| 1421534 | at   | fibroblast growth factor  | NM_008016 | 14210  | gb:NM_008016.   | 2.639 |
| 1422430 | at   | fidgetin-like 1           | NM_021891 | 60530  | gb:NM_021891.   | 2.639 |
| 1423781 | at   | amyloid beta precursor    | BC019163  | 234664 | gb:BC019163.1 / | 2.639 |
| 1425255 | s at | RIKEN cDNA 2810036        | BC006805  | 72692  | gb:BC006805.1 / | 2.639 |
| 1449303 | at   | sestrin 3                 | NM_030261 | 75747  | gb:NM_030261.   | 2.639 |
| 1452199 | at   | RIKEN cDNA 2700094        | BB667255  | 72649  | gb:AF408433.1 / | 2.639 |
| 1447694 | x at | neogenin                  | BB350308  | 18007  | gb:BB350308 /D  | 2.639 |
| 1420174 | s at | Tax1 (human T-cell leu    | C85320    | 52440  | gb:C85320 /DB   | 2.657 |
| 1422414 | a at | calmodulin 2              | NM_007589 | 12314  | gb:NM_007589.   | 2.657 |
| 1438680 | at   | RIKEN cDNA A73001         | BB429147  | 330203 | gb:BB429147 /D  | 2.657 |
| 1448283 | a at | ubiquitin-like 1 (sentri  | NM_016682 | 50995  | gb:NM_016682.   | 2.657 |
| 1418281 | at   | RAD51 homolog (S. ce      | NM_011234 | 19361  | gb:NM_011234.   | 2.676 |
| 1423564 | a at | phosphoribosylaminoin     | BM207712  | 67054  | gb:BM207712 /I  | 2.676 |
| 1424205 | at   | SWI/SNF related, matri    | BI661719  | 93762  | gb:BC021922.1 / | 2.676 |
| 1427161 | at   | leucine, glutamic acid,   | BE848253  | 108000 | gb:BB049243 /D  | 2.676 |
| 1433440 | x at | ubiquitin-like 1 (sentri  | BB791850  | 50995  | gb:BB791850 /D  | 2.676 |
| 1431353 | at   | RIKEN cDNA C33005         | AA276770  | 78704  | gb:AA276770 /I  | 2.676 |
| 1436247 | at   | RIKEN cDNA 4632419        | AW552294  | 74038  | gb:AW552294 /I  | 2.676 |
| 1426380 | at   | eukaryotic translation in | AW741459  | 75705  | gb:AW741459 /I  | 2.694 |
| 1426985 | s at | RIKEN cDNA 2810485        | AV337692  | 72826  | gb:AV337692 /I  | 2.694 |
| 1438571 | at   | budding uninhibited by    | RR479886  | 12235  | gb:RR479886 /D  | 2.694 |

|         |      |                          |           |        |                 |       |
|---------|------|--------------------------|-----------|--------|-----------------|-------|
| 1448959 | at   | NADH dehydrogenase       | NM_010887 | 17993  | gb:NM_010887.   | 2.713 |
| 1449217 | at   | caspase 8 associated pro | NM_011997 | 26885  | gb:NM_011997.   | 2.713 |
| 1451669 | at   | protein phosphatase 1B   | AJ271836  | 19043  | gb:AJ271836.1 / | 2.713 |
| 1452422 | a at | U2 small nuclear ribonu  | AW537796  | 20639  | gb:AW537796 /I  | 2.713 |
| 1418563 | at   | RIKEN cDNA 1200009       | BC006030  | 66870  | gb:NM_025814.   | 2.732 |
| 1448172 | at   | malate dehydrogenase     | NM_008618 | 17449  | gb:NM_008618.   | 2.732 |
| 1459835 | s at | DnaJ (Hsp40) homolog     | BB414617  | 15502  | gb:BB414617 /D  | 2.732 |
| 1423847 | at   | RIKEN cDNA 2810406       | BC025460  | 68298  | gb:BC025460.1 / | 2.751 |
| 1424264 | at   | mediator of RNA polyn    | BC013096  | 69792  | gb:BC013096.1 / | 2.751 |
| 1435820 | x at | discoidin domain recept  | AI874681  | 12305  | gb:AI874681 /D  | 2.751 |
| 1455961 | at   | membrane metallo endo    | AV174022  | 17380  | gb:AV174022 /E  | 2.751 |
| 1434678 | at   | expressed sequence AI6   | AV306759  | 102927 | gb:AV306759 /E  | 2.751 |
| 1449628 | s at | START domain contain     | AI852671  | 99138  | gb:AI852671 /D  | 2.770 |
| 1442350 | at   | 0 day neonate skin cDN   | AV233462  |        | gb:AV233462 /E  | 2.770 |
| 1438540 | at   | Transcribed sequences    | AV328325  |        | gb:AV328325 /E  | 2.789 |
| 1432016 | a at | isocitrate dehydrogenas  | AK003393  | 67834  | gb:AK003393.1 / | 2.809 |
| 1451080 | at   | ubiquitin specific prote | BC018179  | 230484 | gb:BC018179.1 / | 2.828 |
| 1423091 | a at | glycoprotein m6b         | AK016567  | 14758  | gb:AK016567.1 / | 2.848 |
| 1452242 | at   | RIKEN cDNA 1200008       | AK004655  | 74107  | gb:AK004655.1 / | 2.848 |
| 1448635 | at   | SMC2 structural mainte   | NM_008017 | 14211  | gb:NM_008017.   | 2.868 |
| 1447693 | s at | neogenin                 | BB350308  | 18007  | gb:BB350308 /D  | 2.868 |
| 1437370 | at   | shugoshin-like 2 (S. po  | AV316937  | 68549  | gb:AV316937 /E  | 2.949 |
| 1423591 | at   | FGFR1 oncogene partn     | AK004662  | 67529  | gb:AK004662.1 / | 2.969 |
| 1429642 | at   | AN1, ubiquitin-like, ho  | AK012639  | 67492  | gb:AK012639.1 / | 2.969 |
| 1422643 | at   | monooxygenase, DBH-      | NM_021509 | 59012  | gb:NM_021509.   | 2.990 |
| 1428976 | at   | thymopoietin             | AK017463  | 21917  | gb:AK017463.1 / | 3.031 |
| 1419513 | a at | ect2 oncogene            | NM_007900 | 13605  | gb:NM_007900.   | 3.117 |
| 1424300 | at   | gem (nuclear organelle)  | BC025157  | 67242  | gb:BC025157.1 / | 3.117 |
| 1425753 | a at | uracil-DNA glycosylase   | BC004037  | 22256  | gb:BC004037.1 / | 3.204 |
| 1438455 | at   | RIKEN cDNA C33005        | AI464220  | 78704  | gb:AI464220 /D  | 3.249 |
| 1420928 | at   | beta galactoside alpha 2 | BG075800  | 20440  | gb:BG075800 /E  | 3.272 |
| 1437313 | x at | high mobility group box  | C85885    | 97165  | gb:C85885 /DB   | 3.272 |
| 1448226 | at   | ribonucleotide reductas  | NM_009104 | 20135  | gb:NM_009104.   | 3.294 |
| 1456901 | at   | Transcribed sequences    | AI450842  |        | gb:AI450842 /D  | 3.555 |
| 1456756 | at   | RIKEN cDNA E430016       | BB295976  | 320578 | gb:BB295976 /D  | 3.681 |
| 1449176 | a at | deoxycytidine kinase     | NM_007832 | 13178  | gb:NM_007832.   | 3.706 |
| 1418656 | at   | LSM5 homolog, U6 sm      | NM_025520 | 66373  | gb:NM_025520.   | 3.784 |
| 1422504 | at   | glycine receptor, beta s | NM_010298 | 14658  | gb:NM_010298.   | 3.864 |
| 1439012 | a at | deoxycytidine kinase     | BB030204  | 13178  | gb:BB030204 /D  | 4.141 |

ells  
t
