# Supplementary material
Source: PubMed Central journal article supplement (PMC2459340)

# MeiZhang\_Figure S7

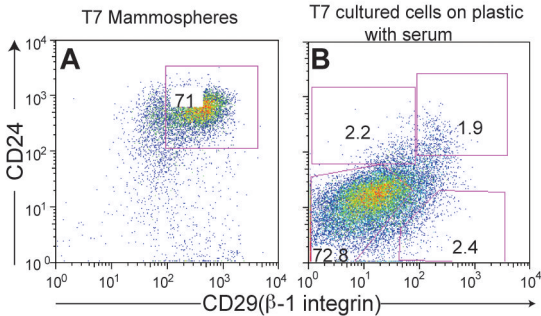

Supplement: NIHMS54487-supplement-Supp_Fig_7.pdf [file NIHMS54487-supplement-Supp_Fig_7.pdf]

# MeiZhang\_Figure S8

Array

qPCR

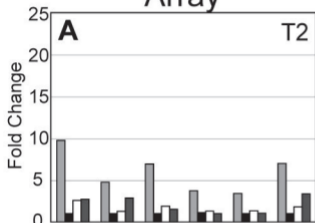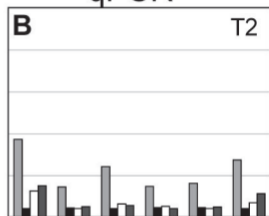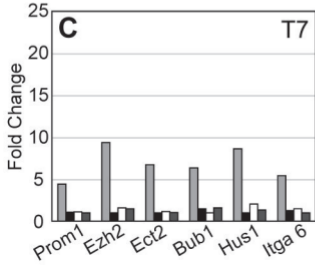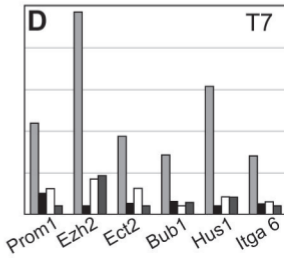

Supplement: NIHMS54487-supplement-Supp_Fig_8.pdf [file NIHMS54487-supplement-Supp_Fig_8.pdf]

# MeiZhang\_Figure S9

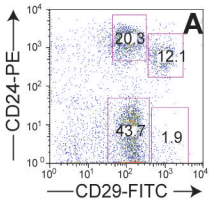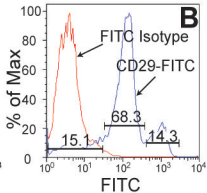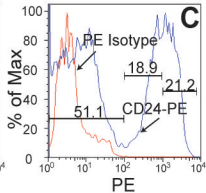

Supplement: NIHMS54487-supplement-Supp_Fig_9.pdf [file NIHMS54487-supplement-Supp_Fig_9.pdf]

MeiZhang\_Figure S6

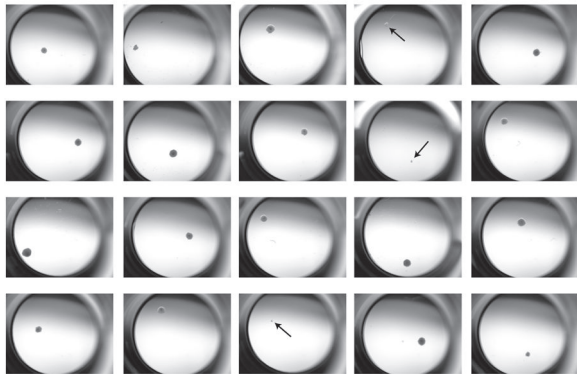

Supplement: NIHMS54487-supplement-Supp__Fig_6.pdf [file NIHMS54487-supplement-Supp__Fig_6.pdf]

# MeiZhang\_Figure S1

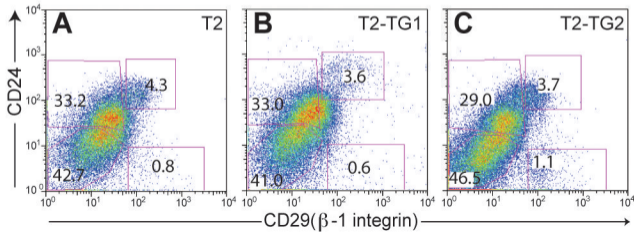

Supplement: NIHMS54487-supplement-Supp__Fig__1.pdf [file NIHMS54487-supplement-Supp__Fig__1.pdf]

# MeiZhang\_Figure S2

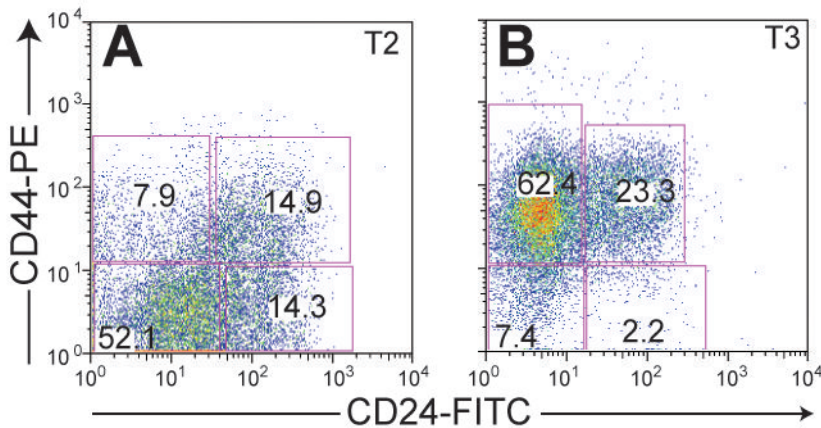

Supplement: NIHMS54487-supplement-Supp__Fig__2.pdf [file NIHMS54487-supplement-Supp__Fig__2.pdf]

# MeiZhang\_Figure S3

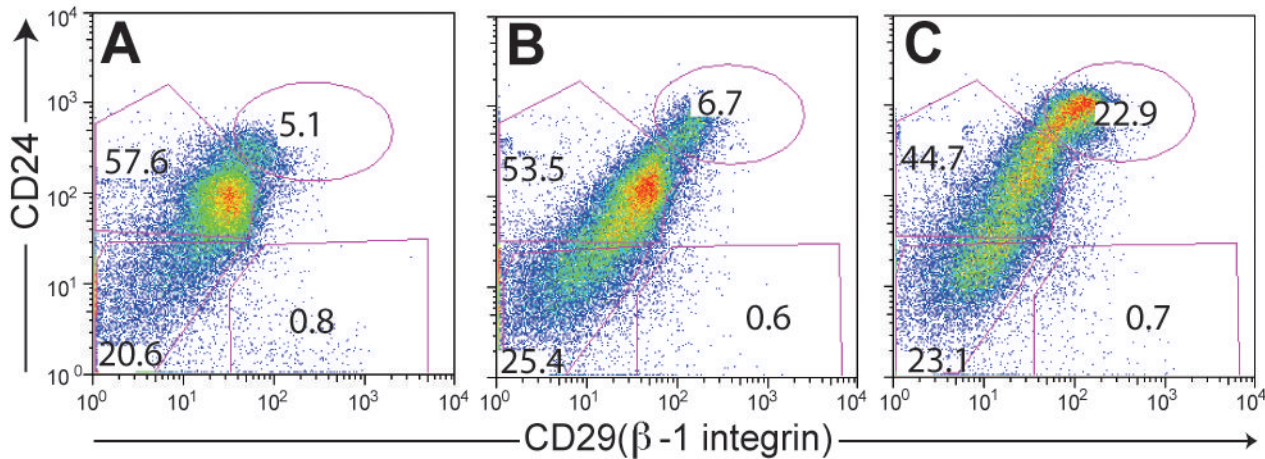

Supplement: NIHMS54487-supplement-Supp__Fig__3.pdf [file NIHMS54487-supplement-Supp__Fig__3.pdf]

**A**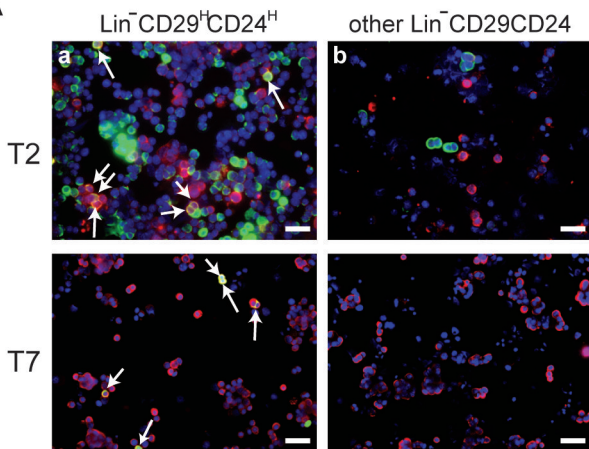**B**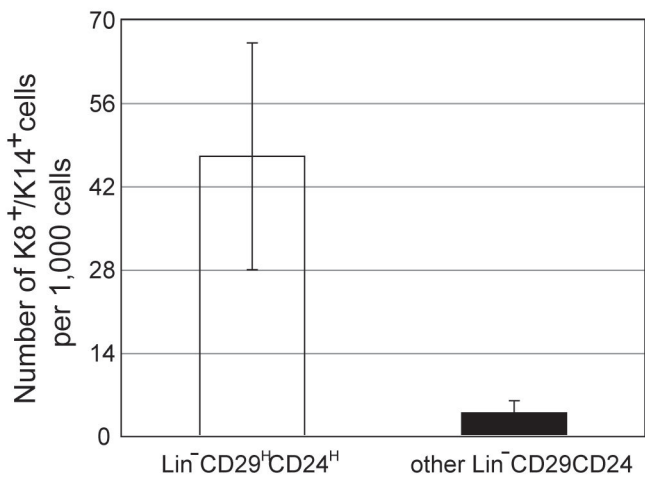

Supplement: NIHMS54487-supplement-Supp__Fig__4.pdf [file NIHMS54487-supplement-Supp__Fig__4.pdf]

# MeiZhang\_Figure S5

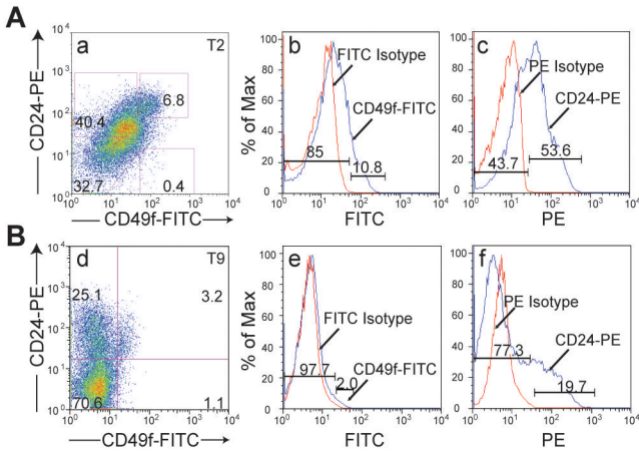

Supplement: NIHMS54487-supplement-Supp__Fig__5.pdf [file NIHMS54487-supplement-Supp__Fig__5.pdf]
